# Supplementary material
Source: PubMed Central journal article supplement (PMC3956165)
Supplement: 1322889111_pnas.201322889SI.pdf [file 1322889111_pnas.201322889SI.pdf]

# Supporting Information

Siewering et al. 10.1073/pnas.1322889111

## SI Materials and Methods

**Construction of Plasmids.** Plasmids, primers, and strains used and constructed in this study are listed in Tables S2–S4. For cloning, *Escherichia coli* strains DH5 $\alpha$  and Top10 were used. Unless otherwise indicated, PCR was performed on either chromosomal DNA of *Neisseria gonorrhoeae* strain MS11 or *Myxococcus xanthus* strain DK1622. To construct pSJ082, T4P secretin-associated protein (tsaP) (annotated as NGFG\_01788 in *N. gonorrhoeae* strain MS11) was amplified by PCR using primers 592 and 593, digested with KpnI and BamHI, and ligated into pIDN3. To construct pKS001, *tsaP<sub>NG</sub>* was amplified by PCR using primers 1001 and 1002, digested with KpnI and EcoRI, and ligated into pIDN3. To construct pKS007, *tsaP<sub>NG</sub>* was amplified by PCR using primers 1058 and 1057, digested with NdeI and HindIII, and cloned into pSJ023. To construct pAW001, *tsaP<sub>NG</sub>* was amplified by PCR using primers 1061 and 1052, digested with NdeI and XhoI, and ligated into pET20b(+). pIMB1 was constructed by cloning overlap PCR product of the two PCR fragments generated with the omxan\_3001-A and omxan\_3001-B primers and the omxan\_3001-C and omxan\_3001-D primers into the HindIII and EcoRI sites of pBJ114. To construct pIMB2, the *tsaP<sub>MX</sub>* gene (annotated as Mxan\_3001 in *M. xanthus* strain DK1622) was amplified by PCR with the primers omxan\_3001-1 and omxan\_3001-2, digested with XbaI and HindIII, and cloned into pSW105. To create pIMB3, the *pilA* promoter and *tsaP<sub>MX</sub>* were amplified from pIMB2 using the primers omxan\_3001-3 and omxan\_3001-4. The PCR product was digested with EcoRI and BamHI, and cloned into the pKA28 vector. To create pIMB5, *tsaP<sub>MX</sub>* lacking the first 21 bp was amplified with the omxan\_3001-7 and omxan\_3001-8 primers, digested with BamHI and HindIII, and cloned into the pET45b(+) vector.

**Construction of *N. gonorrhoeae* Strains.** *N. gonorrhoeae* mutants were created by homologous recombination into the chromosome. Either plasmid DNA or PCR products were introduced by natural transformation or electroporation as described previously (1). MS11 was used as the WT strain. To generate SJ004-MS, in which a sequence encoding a His<sub>8</sub>-tag was inserted between P154 and F155 of the small basic repeat region of PilQ, two PCR products were generated with primers 552 and 572 and primers 573 and 553. These products were mixed and used as a template for a third PCR using primers 552 and 553. This PCR product was transformed to strain MS11. To generate strain SJ082-MS, in which *tsaP* is disrupted by insertion of plasmid pIDN3, MS11 was transformed with pSJ082. To generate strain KS035, in which the *tsaP* deletion in strain SJ082-MS is complemented by a copy of *tsaP* behind the *lac* promoter of plasmid pSJ023 inserted between the *lctP* and *aspC* genes, SJ082-MS was transformed with pKS007. All chromosomal mutations were confirmed by DNA sequence analysis.

**Construction of *M. xanthus* Strains.** For all experiments with *M. xanthus*, DK1622 was used as WT and all *M. xanthus* strains used are derivatives of DK1622. Plasmids were introduced into *M. xanthus* by electroporation. SA6011, which contains an in-frame deletion of *tsaP* from positions 31–1,176 relative to the start codon, was generated by transformation of DK1622 with pIMB1 using standard techniques (2). *M. xanthus* strains SA6014 and SA6013, in which the *tsaP<sub>MX</sub>* deletion is complemented either by *tsaP<sub>MX</sub>* or by a C-terminal fusion of mCherry to *tsaP<sub>MX</sub>* under control of the *pilA* promoter, were generated by electroporation of SA6011 with pIMB2 and pIMB3, respectively, followed

by integration of the two plasmids at the Mx8 *attB* site. The C-terminal fusion of mCherry to *tsaP<sub>MX</sub>* under control of the *pilA* promoter was introduced in different strains by electroporation with plasmid pIMB3. C-terminal fusions of PilO, PilP, and PilQ to superfolder GFP (sfGFP) under control of the *pilA* promoter were introduced in the  $\Delta$ *tsaP* strain by electroporation with the plasmids pSC106, pSC102, and pSC120, respectively. An N-terminal fusion of YFP to PilT under control of the *pilA* promoter was introduced in the  $\Delta$ *tsaP* strain by electroporation with the plasmid pIB75. All strains constructed were confirmed by PCR.

**Growth.** *E. coli* strains were grown at 37 °C in either LB or Luria agar plates. When required, erythromycin (450  $\mu$ g/mL), ampicillin (100  $\mu$ g/mL), or isopropyl- $\beta$ -D-thiogalactoside (IPTG; 0.5 M) was added. *N. gonorrhoeae* strains were grown in gonococcal base medium liquid (GCBL) medium with 0.042% sodium bicarbonate and Kellogg's supplements (3) or on gonococcal base (GCB) plates containing Kellogg's supplements at 37 °C in 5% (vol/vol) CO<sub>2</sub>. When required, erythromycin (10  $\mu$ g/mL), chloramphenicol (10  $\mu$ g/mL), or IPTG (1 mM) was added. *M. xanthus* strains were grown at 32 °C in 1% Casitone-Tris (CTT) broth (4) or on CTT agar plates supplemented with 1.5% (wt/vol) agar. Kanamycin (50  $\mu$ g/mL) or oxytetracycline (10  $\mu$ g/mL) was added when appropriate.

**Detailed Purification of TsaP.** *E. coli* BL21 star (DE3) cells transformed with pAW001 were grown to an OD<sub>600</sub> of 0.5 in LB at 37 °C and induced with 0.5 mM IPTG. After incubation for another 3 h, cells were harvested by centrifugation at 4 °C for 10 min at 7,500  $\times$  g. Cells were resuspended in 10 mL of buffer B [100 mM NaCl, 15 mM imidazole, 10% (wt/vol) glycerol, 50 mM Hepes (pH 7.5)] containing Protease Inhibitor Mixture (Roche) and 10  $\mu$ g/mL DNase I, and then lysed by three passages through a French press at 1,000 psi. The suspension was centrifuged at 4 °C for 10 min at 12,000  $\times$  g, followed by ultracentrifugation for 30 min at 180,000  $\times$  g. The supernatant was loaded on a HiTrap Chelating HP column (GE Healthcare) equilibrated with buffer B. After washing the column with buffer B containing 20, 40, and 50 mM imidazole, TsaP was eluted with a gradient from 50–400 mM imidazole in buffer B. Fractions containing TsaP were collected. These fractions were applied to a Superdex 75 HiLoad 16/60 column equilibrated with buffer C [100 mM NaCl, 50 mM Hepes (pH 7.5)]. Fractions containing TsaP were collected and frozen.

**Detailed Purification of His<sub>6</sub>-TsaP<sub>MX</sub> $\Delta$ 7 Under Denaturing Conditions.** *E. coli* Rosetta 2 (DE3) cells transformed with plasmid pIMB5 were grown to an OD<sub>600</sub> of 0.5 in LB at 37 °C and induced with 1 mM IPTG at 18 °C overnight. His<sub>6</sub>-TsaP<sub>MX</sub> $\Delta$ 7 was purified from inclusion bodies under denaturing conditions on an Ni<sup>2+</sup>-nitrilotriacetic acid-agarose column (Qiagen) using buffer B [8 M urea, 10 mM Tris, 100 mM NaH<sub>2</sub>PO<sub>4</sub> (pH 8.0)] as described by the manufacturer. The bound protein was eluted with buffer E containing 8 M urea, 10 mM Tris, and 100 mM NaH<sub>2</sub>PO<sub>4</sub> (pH 4.5), and then dialyzed against 300 mM NaCl, 10 mM imidazole, and 50 mM NaH<sub>2</sub>PO<sub>4</sub> (pH 8.0).

**Peptidoglycan Isolation, Binding, and Zymography.** Murein sacculi of *N. gonorrhoeae* cells were purified as described previously (5) from 3 L of an exponentially growing culture. The presence of sacculi was confirmed by EM. To test for binding to peptidoglycan (PG), 5  $\mu$ g of purified *N. gonorrhoeae* TsaP or 5  $\mu$ g of *E. coli* exonuclease I was incubated with or without 1 mg of PG in a volume of 150  $\mu$ L for 1 h at 15 °C in protein purification buffer C [100 mM NaCl, 50 mM Hepes (pH 7.5)]. Samples were spun



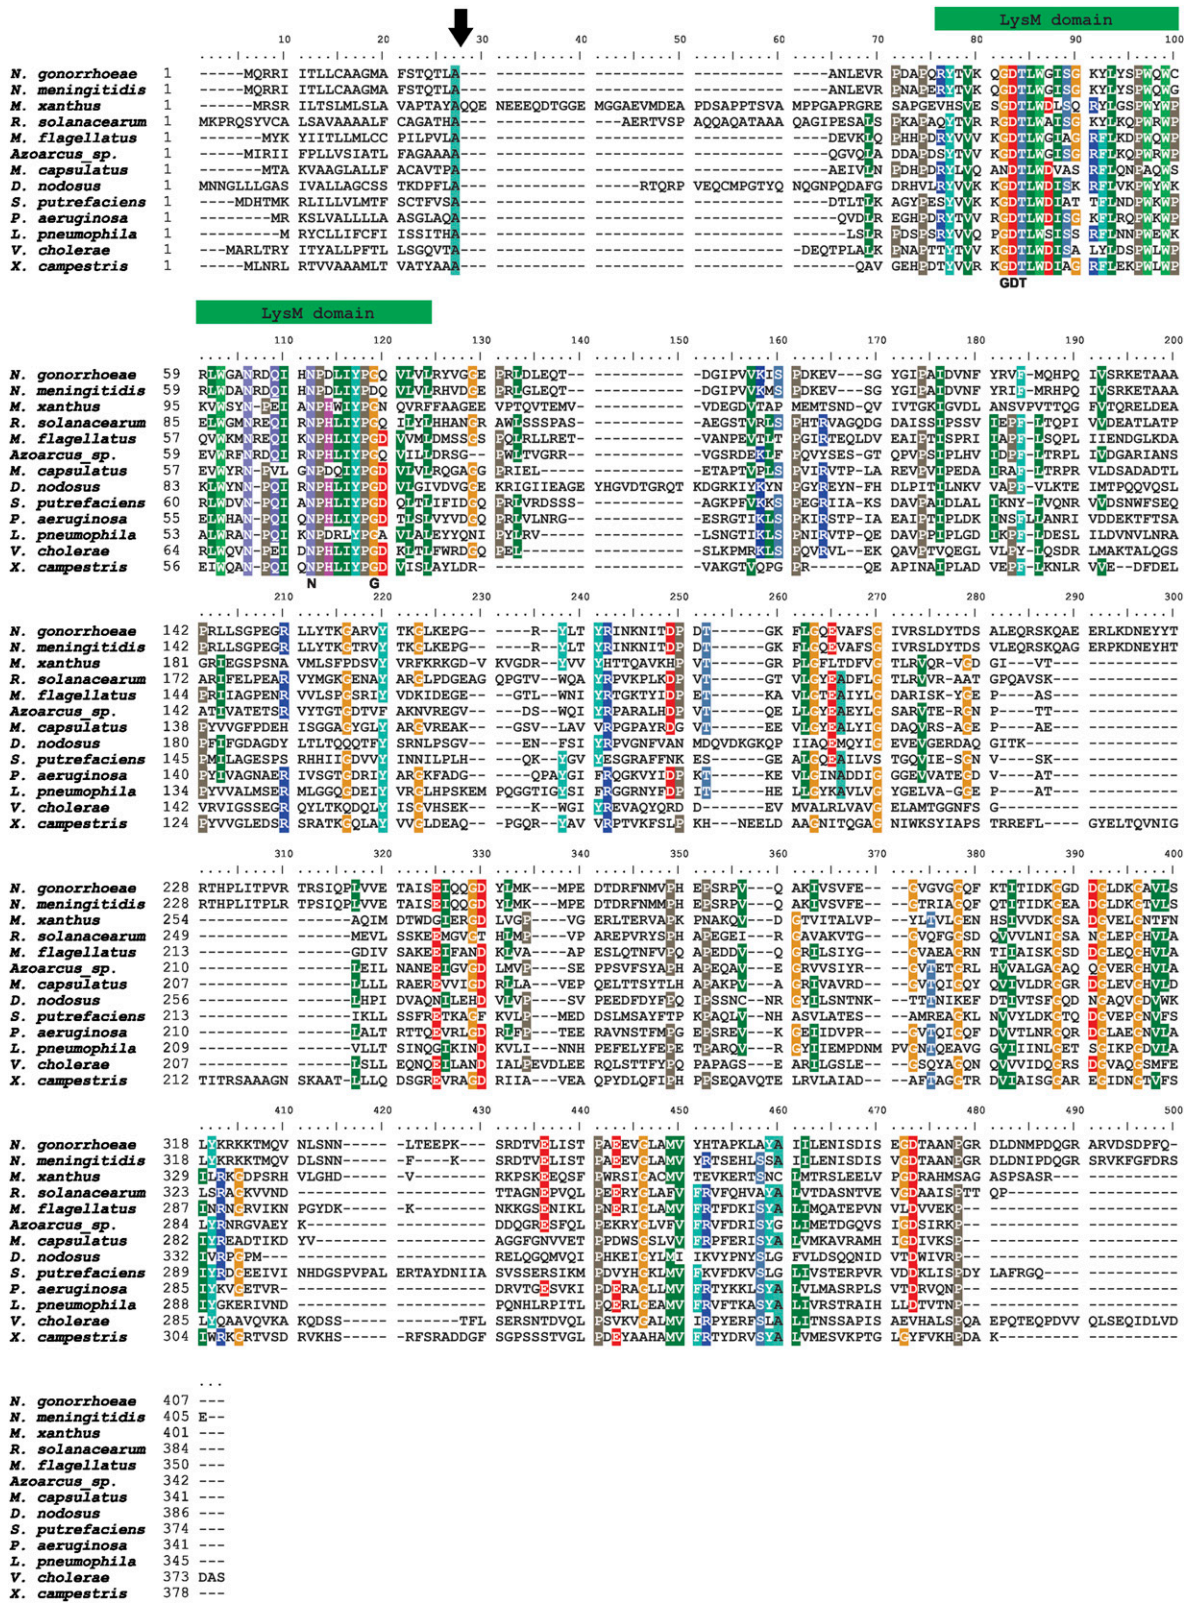

Fig. S2. Alignment of Tsap homologs of different organisms. Tsap homologs described in Table S1 were aligned. Colored residues are <50% conserved. The putative signal sequence cleavage site is indicated with a black arrow, whereas the LysM domain is indicated with a green box. Residues (G40, D41, T42, N70, and G77) that are highly conserved in LysM domains are indicated in bold below the alignment.

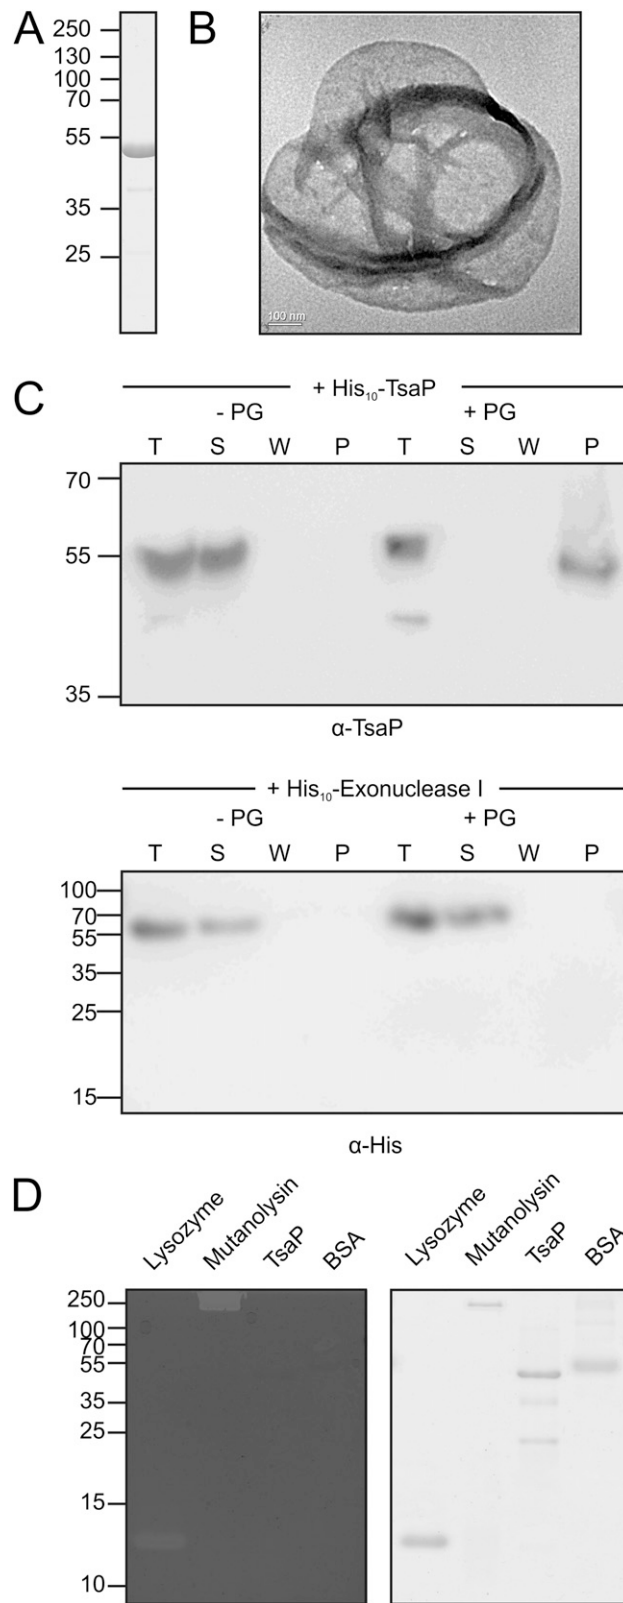

**Fig. S3.** Characterization of binding of TsaP to isolated PG sacculi. (A) TsaP was overexpressed and purified from *E. coli*. Fractions eluted from the size exclusion column at a size corresponding to the monomer were analyzed by SDS/PAGE and Coomassie staining. (B) PG sacculi were isolated from *N. gonorrhoeae* and analyzed by EM. (C) To test for binding of TsaP to PG, 5  $\mu$ g of TsaP was incubated without (Upper, -PG) or with (Upper, +PG) 1 mg of PG. Samples (total, T) were centrifuged, the supernatant was collected (supernatant, S), and the pellet was resuspended. The samples were centrifuged again, the supernatant (wash, W) was collected, and the pellet fraction (Pellet, P) was resuspended. The different fractions were analyzed by immunoblotting using  $\alpha$ -TsaP antibodies. As a control, 5  $\mu$ g of purified His<sub>10</sub>-tagged exonuclease I was incubated without (Lower, -PG) or with (Lower, +PG) 1 mg of PG, treated as described above, and

Legend continued on following page

analyzed using  $\alpha$ -His antibodies. To test for PG hydrolysis, zymography was performed. (D) Lysozyme, mutanolysin, TsaP, and BSA (5  $\mu$ g each) were applied to SDS gels containing purified murein sacculi. (Left) Proteins were stained with Coomassie blue. (Right) Second gel was incubated in renaturation buffer to allow for refolding of the proteins, and PG hydrolysis was detected by staining of sacculi with methylene blue. Clear zones of hydrolysis are observed for mutanolysin and lysozyme but not for BSA and TsaP. The hydrolysis zone of mutanolysin was observed at a height comparable to proteins with a molecular weight of ~250 kDa. Most likely, mutanolysin is not completely unfolded during the SDS/PAGE and is retarded by binding to the murein during electrophoresis, an effect that has been seen for other proteins before (1). Because the high level of O-acetylation of *N. gonorrhoeae* murein inhibits the activity of lysozyme (2), the specific activity of lysozyme was lower than the activity of mutanolysin.

1. Juarez ZE, Stinson MW (1999) An extracellular protease of *Streptococcus gordonii* hydrolyzes type IV collagen and collagen analogues. *Infect Immun* 67(1):271–278.
2. Blundell JK, Perkins HR (1985) The peptidoglycan of *Neisseria gonorrhoeae*, with or without O-acetyl groups, contains anhydro-muramyl residues. *J Gen Microbiol* 131(12):3397–3400.

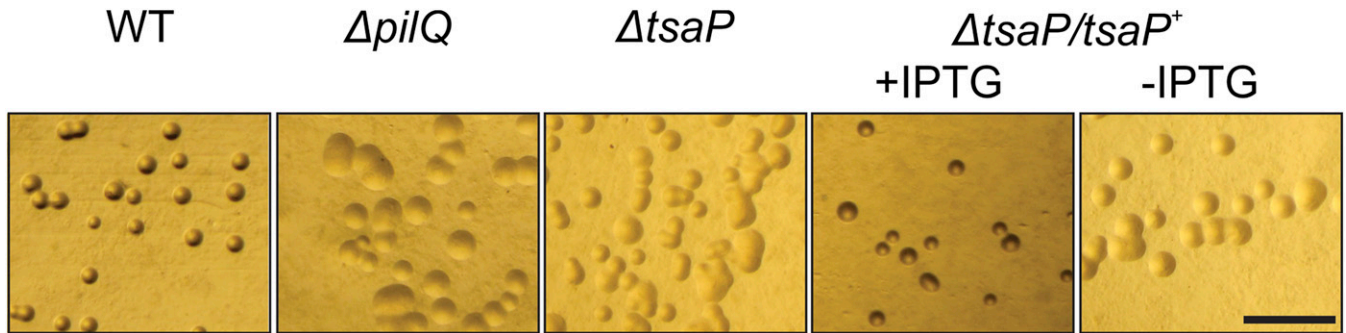

**Fig. S4.** TsaP is important for type 4 pili (T4P)-dependent colony morphology. The indicated *N. gonorrhoeae* strains were incubated at 37 °C for 24 h on GCB plates. (Scale bar: 1 cm.)

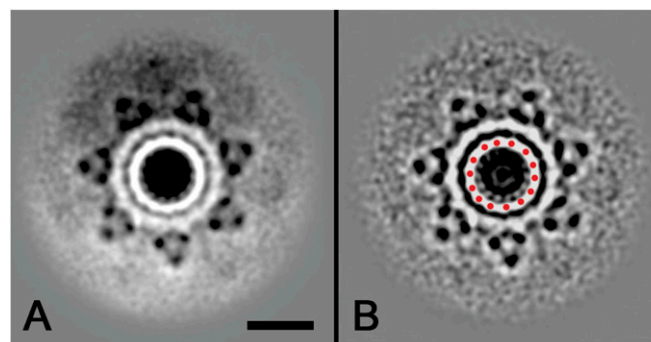

**Fig. S5.** Projection maps of single-particle EM analysis of the PilQ complex from the *N. gonorrhoeae*  $\Delta$ *tsaP/tsaP*<sup>+</sup> strain. (A) Two-dimensional map of the  $\Delta$ *tsaP/tsaP*<sup>+</sup> particle seen in a slightly tilted top-view position. A small protein domain is visible inside the inner rings, especially in the lower half. It is present in 14 copies, but some copies in the upper half are partly invisible because of partial overlap with the main body of the ring, which is the effect of tilt on the carbon support film of most of the particles. (B) Fine details become stronger after imposing a high-pass filter on the image in such a way that all waves with a frequency representing wavelengths lower than 1.5 nm have been suppressed by 50%. The red dots mark places with a wider part of the inner rings to which the small protein domains are connected. (Scale bar: 10 nm.)

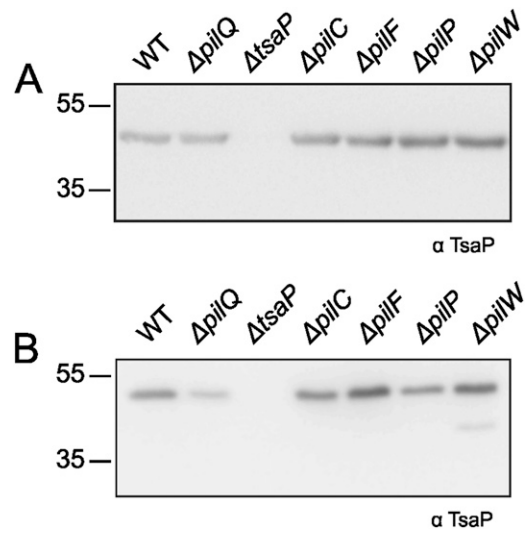

**Fig. 56.** TsaP levels are reduced in membranes of the  $\Delta pilQ$  strain but not in the membranes of the  $\Delta pilC$ ,  $\Delta pilF$ ,  $\Delta pilP$ , and  $\Delta pilW$  strains. (A) Immunoblot analysis of equal amounts of total cell extracts of the *N. gonorrhoeae* WT,  $\Delta pilQ$ ,  $\Delta tsaP$ ,  $\Delta pilC$ ,  $\Delta pilF$ ,  $\Delta pilP$ , and  $\Delta pilW$  strains using  $\alpha$ -TsaP antibodies. (B) Immunoblot analysis of membranes isolated from the *N. gonorrhoeae* WT,  $\Delta pilQ$ ,  $\Delta tsaP$ ,  $\Delta pilC$ ,  $\Delta pilF$ ,  $\Delta pilP$ , and  $\Delta pilW$  strains using  $\alpha$ -TsaP antibodies.

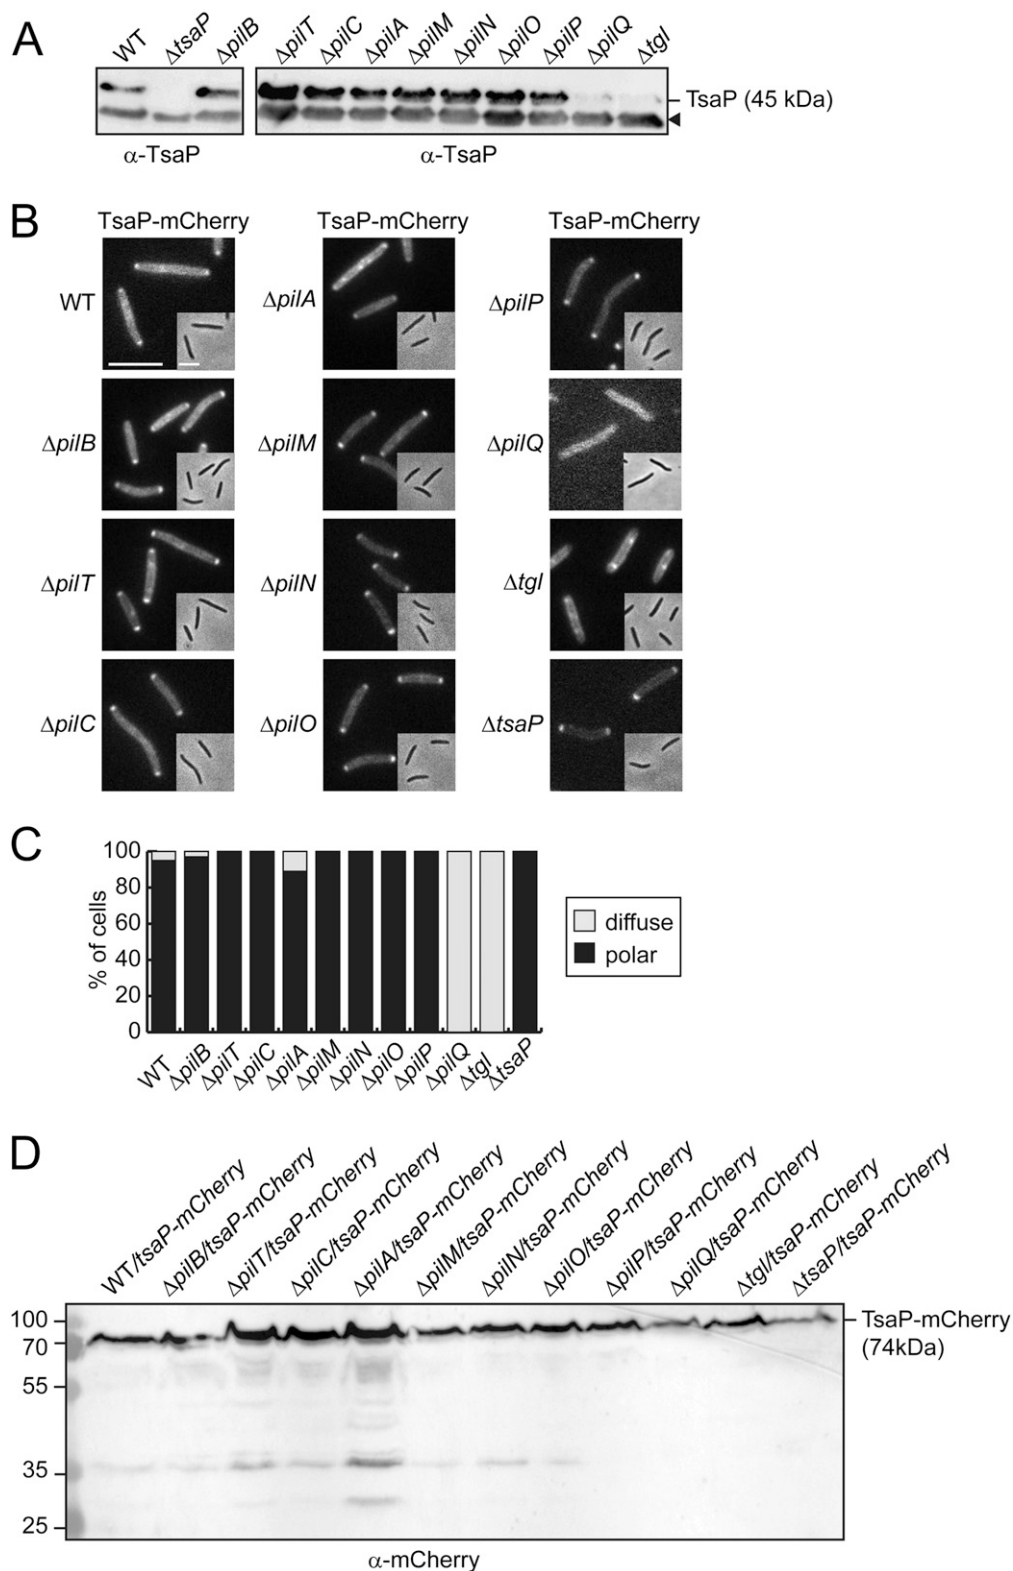

**Fig. S7.** Polar localization of TsaP<sub>MX</sub> specifically depends on PilQ<sub>MX</sub> and Tgl<sub>MX</sub>. (A) TsaP protein levels in WT and the indicated in-frame deletion mutants. Equal amounts of total cell extracts of the indicated strains were separated by SDS/PAGE and analyzed by immunoblotting with antibodies directed against TsaP. A nonspecific band present in all samples is indicated by the black triangle. (B) Localization of TsaP<sub>MX</sub>-mCherry in WT and the indicated in-frame deletion mutants. Cells from exponentially growing cultures of the indicated genotypes were transferred to a 1.5% (wt/vol) agar pad on a microscope slide and imaged by fluorescence microscopy. (Insets) Corresponding phase-contrast images. Note that the  $\Delta pilQ$  strain is also included for comparison. (Scale bar for main figure and Inset: 5  $\mu$ m.) (C) Patterns of fluorescence signals were grouped into two categories. The histogram illustrates the distribution of localization patterns of TsaP<sub>MX</sub>-mCherry in the indicated in-frame deletion mutants ( $n = 90$ –250). (D) Immunoblot analysis of the accumulation of TsaP<sub>MX</sub>-mCherry. Equal amounts of total cell extracts of the indicated strains were separated by SDS/PAGE and analyzed by immunoblotting using  $\alpha$ -mCherry antibodies. Positions of TsaP<sub>MX</sub>-mCherry (Right) and molecular size markers (Left) in kilodaltons are indicated.

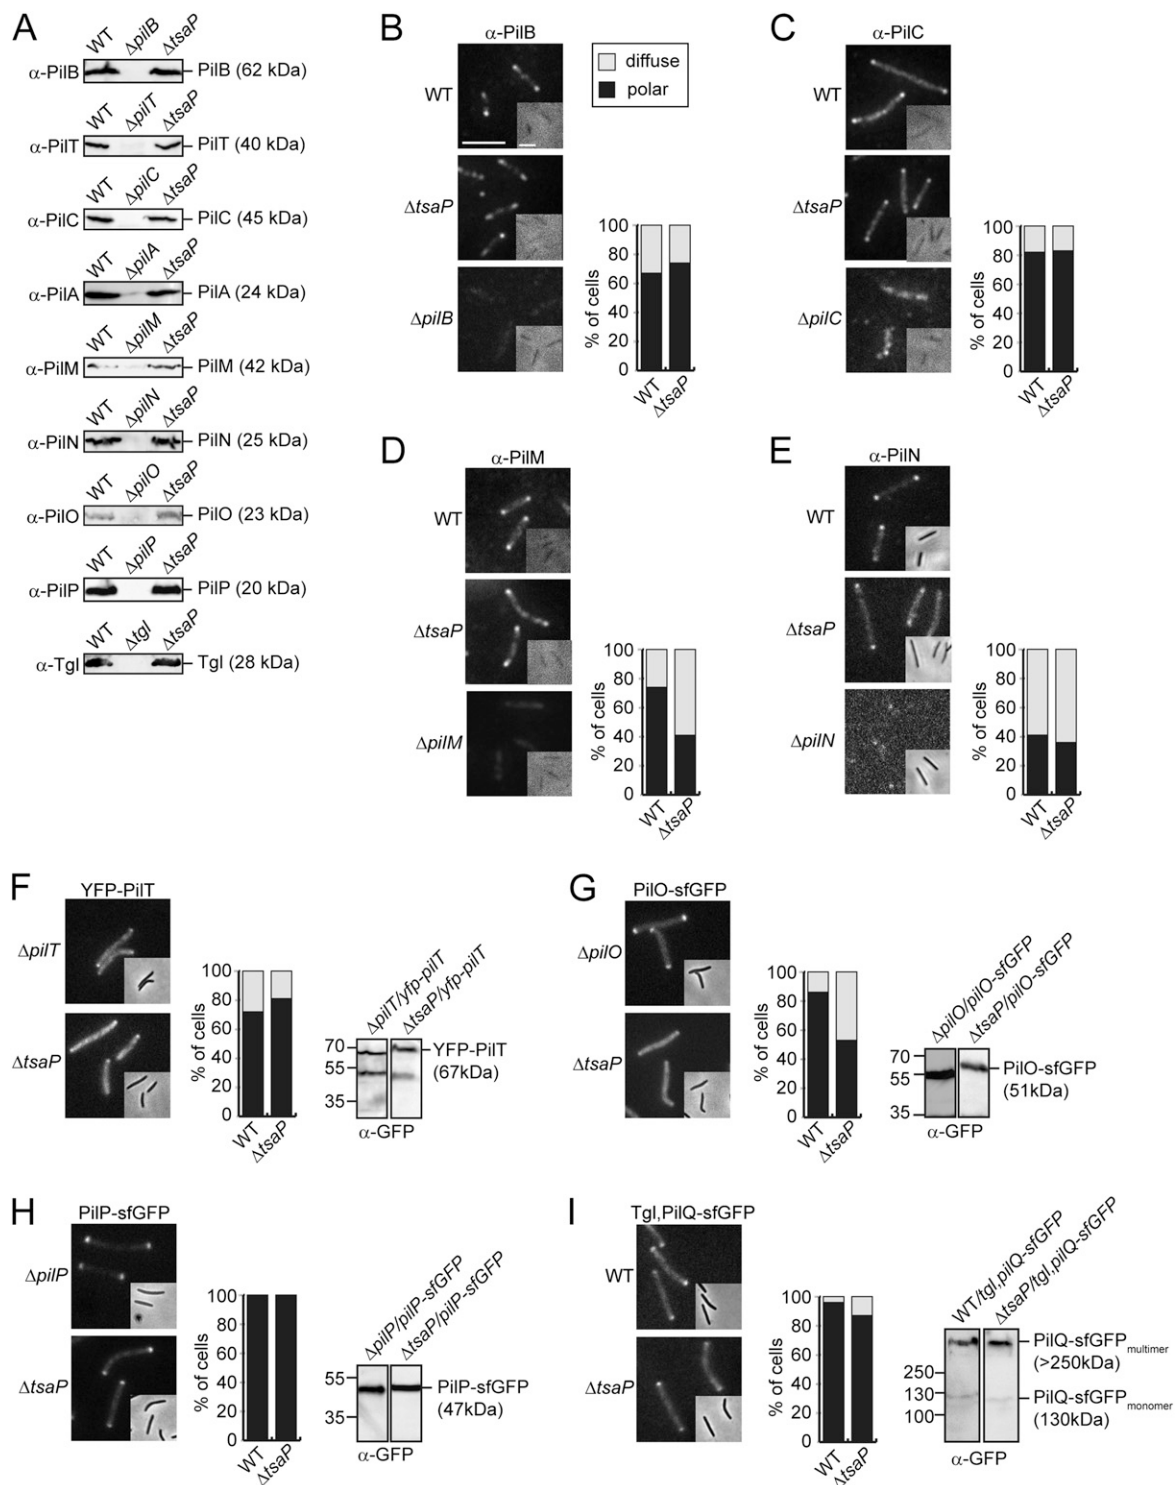

**Fig. 58.** Accumulation and localization of *M. xanthus* proteins involved in T4P are independent of  $TsaP_{MX}$ . (A) Immunoblotting analyses of the accumulation of different *M. xanthus* proteins involved in T4P assembly in the  $\Delta tsaP_{MX}$  mutant. Immunoblotting was performed as described in Fig. S7C using the indicated antibodies. Detected proteins with molecular sizes are indicated on the right. (B–E) Localization of  $PilB_{MX}$ ,  $PilC_{MX}$ ,  $PilM_{MX}$ , and  $PilN_{MX}$  was determined by immunofluorescence microscopy with specific antibodies. (Insets) Corresponding phase-contrast images. (Scale bar for main figure and Inset: 5  $\mu$ m.) The histograms illustrate the distribution of localization patterns ( $n = 150$ –330). Black and gray bars indicate polar and diffuse localization, respectively. (F–I) Localization of  $PilT_{MX}$ ,  $PilO_{MX}$ ,  $PilP_{MX}$ , and  $PilQ_{MX}$  in the  $\Delta tsaP_{MX}$  mutant was investigated using fluorescent fusions as described in Fig. S7A. (Insets) Corresponding phase-contrast images. (Scale bar for main figure and Inset: 5  $\mu$ m.) The histograms illustrate the distribution of localization patterns ( $n = 60$ –250). Black and gray bars indicate polar and diffuse localization, respectively. (Right) Immunoblot analyses of the accumulation of fluorescently tagged proteins are shown. Relevant proteins and molecular size markers in kilodaltons are indicated.



**Table S1. Nomenclature of TsaP homologs and ATPase and secretin proteins of type IV pili assembly systems and type 2 secretion systems of different organisms**

| Organism                                                  | Type IV pili    |          |                   | TsaP homolog  | Type 2 secretion system |          |
|-----------------------------------------------------------|-----------------|----------|-------------------|---------------|-------------------------|----------|
|                                                           | Assembly ATPase | Secretin | Retraction ATPase |               | Secretion ATPase        | Secretin |
| <i>Neisseria gonorrhoeae</i> <sup>a</sup>                 | PilF            | PilQ     | PilT              | NGFG_01788    |                         |          |
| <i>Neisseria meningitidis</i> <sup>b</sup>                | PilF            | PilQ     | PilT, PilU        | NMC0101       |                         |          |
| <i>Ralstonia solanacearum</i> <sup>c</sup>                | PilF            | PilQ     | PilT, PilU        | RSc0069       |                         |          |
| <i>Methylobacillus flagellatus</i> <sup>d</sup>           | PilF            | PilQ     | PilT, PilU        | Mfla_0188     |                         |          |
| <i>Azoarcus</i> spp. <sup>e</sup>                         | PilF            | PilQ     | PilT, PilU        | azo0098       |                         |          |
| <i>Methylococcus capsulatus</i> <sup>f</sup>              | PilB            | PilQ     | PilT, PilU        | MCA2842       |                         |          |
| <i>Dichelobacter nodosus</i> <sup>g</sup>                 | PilB            | PilQ     | PilT, PilU        | DNO_0155      |                         |          |
| enteropathogenic <i>Escherichia coli</i> <sup>h</sup>     | HofB            | HofQ     | —                 | —             |                         |          |
| Plasmid R64 <sup>i</sup>                                  | PilQ            | PilN     | —                 | —             |                         |          |
| <i>Aggregatibacter actinomycetemcomitans</i> <sup>j</sup> | TadA            | RcpA     | —                 | —             |                         |          |
| <i>Shewanella putrefaciens</i> <sup>k</sup>               | PilB            | PilQ     | PilT, PilU        | Sputcn32_0025 | GspE                    | GspD     |
| <i>Pseudomonas aeruginosa</i> <sup>l</sup>                | PilB            | PilQ     | PilT, PilU        | PA0020        | XcpR                    | XcpQ     |
| <i>Legionella pneumophila</i> <sup>m</sup>                | PilB            | PilQ     | PilT              | lpg2596       | LspE                    | LspD     |
| <i>Vibrio cholerae</i> <sup>n</sup>                       | PilB            | PilQ     | PilT, PilU        | VC0047        | GspE                    | GspD     |
| <i>Xanthomonas campestris</i> <sup>o</sup>                | PilB            | PilQ     | PilT, PilU        | XCC3750       | XpsE                    | XpsD     |
| <i>Myxococcus xanthus</i> <sup>p</sup>                    | PilB            | PilQ     | PilT              | MXAN_3001     | GspE                    | GspD     |
| <i>Klebsiella oxytoca</i> <sup>q</sup>                    | —               | —        | —                 | —             | PulE                    | PulD     |
| <i>Yersinia enterocolitica</i> <sup>r</sup>               | —               | —        | —                 | —             | GspE                    | GspD     |

<sup>a</sup>*Neisseria gonorrhoeae* MS11.

<sup>b</sup>*Neisseria meningitidis* Fam18.

<sup>c</sup>*Ralstonia solanacearum* GMI1000.

<sup>d</sup>*Methylobacillus flagellatus* KT.

<sup>e</sup>*Azoarcus* sp. BH72.

<sup>f</sup>*Methylococcus capsulatus* str. Bath.

<sup>g</sup>*Dichelobacter nodosus* VCS1703A.

<sup>h</sup>*Escherichia coli* O104:H4 str. C227-11.

<sup>i</sup>*Aggregatibacter actinomycetemcomitans* D11S-1.

<sup>k</sup>*Shewanella putrefaciens* CN-32.

<sup>l</sup>*Pseudomonas aeruginosa* PAO1.

<sup>m</sup>*Legionella pneumophila* subsp. *pneumophila* str. Philadelphia I.

<sup>n</sup>*Vibrio cholerae* O1 biovar El Tor str. N16961.

<sup>o</sup>*Xanthomonas campestris* pv. *Campestris* str. American Type Culture Collection 33913.

<sup>p</sup>*Myxococcus xanthus* DK1612.

<sup>q</sup>*Klebsiella oxytoca* KCTC 1686.

<sup>r</sup>*Yersinia enterocolitica* subsp. *enterocolitica* 8081.

**Table S2. Plasmids used in this work**

| Plasmid   | Relevant characteristics                                                               | Source                                                       |
|-----------|----------------------------------------------------------------------------------------|--------------------------------------------------------------|
| pET20b(+) | Expression vector, T7 promoter; Amp <sup>R</sup>                                       | Merck Millipore                                              |
| pET45b(+) | Expression vector, T7 promoter, N-terminal His <sub>6</sub> -tag; Amp <sup>R</sup>     | Merck Millipore                                              |
| pIDN3     | Insertion duplication mutagenesis vector for <i>N. gonorrhoeae</i> , Erm <sup>R</sup>  | 1                                                            |
| pSW105    | Vector with Mx8 <i>attP</i> site and <i>pilA</i> promoter, Km <sup>R</sup>             | S. Weiss (Max Planck Institute for Terrestrial Microbiology) |
| pSWU30    | Vector with Mx8 <i>attP</i> site, Tet <sup>R</sup>                                     | 2                                                            |
| pKA28     | pSWU30 with <i>pomZ</i> -mCherry, Mx8 <i>attP</i> ;Tet <sup>R</sup>                    | 3                                                            |
| pBJ114    | Vector for in-frame deletion constructs, Km <sup>R</sup>                               | 4                                                            |
| pSJ023    | N-terminal One-STrEP-tagged <i>ssb</i> gene cloned in pKH37 vector, Cm <sup>R</sup>    | 5                                                            |
| pIB75     | pSWU30-P <sub><i>pilA</i></sub> - <i>yfp-pilT</i> , Tet <sup>R</sup>                   | 6                                                            |
| pSC102    | pSC101-P <sub><i>pilA</i></sub> - <i>pilP</i> , Tet <sup>R</sup>                       | 7                                                            |
| pSC106    | pSC101-P <sub><i>pilA</i></sub> - <i>pilO</i> , Tet <sup>R</sup>                       | 7                                                            |
| pSC120    | pSC101-P <sub><i>pilA</i></sub> - <i>tgl-pilQ</i> , Tet <sup>R</sup>                   | 7                                                            |
| pSJ082    | pIDN3- <i>tsaP</i> , Erm <sup>R</sup>                                                  | This study                                                   |
| pKS007    | pSJ023- <i>tsaP</i> , Cm <sup>R</sup>                                                  | This study                                                   |
| pAW001    | Vector for overexpression of 10× His-tagged TsaP, Amp <sup>R</sup>                     | This study                                                   |
| pIMB1     | pBJ114- <i>tsaP</i> <sub>Mx</sub> in-frame deletion, Km <sup>R</sup>                   | This study                                                   |
| pIMB2     | pSW105-P <sub><i>pilA</i></sub> - <i>tsaP</i> <sub>Mx</sub> , Km <sup>R</sup>          | This study                                                   |
| pIMB3     | pSWU30-P <sub><i>pilA</i></sub> - <i>tsaP</i> <sub>Mx</sub> -mCherry, Tet <sup>R</sup> | This study                                                   |
| pIMB5     | pET45b(+)- <i>tsaP</i> <sub>MxΔ7</sub> , Amp <sup>R</sup>                              | This study                                                   |

- Hamilton HL, Domínguez NM, Schwartz KJ, Hackett KT, Dillard JP (2005) *Neisseria gonorrhoeae* secretes chromosomal DNA via a novel type IV secretion system. *Mol Microbiol* 55(6):1704–1721.
- Jakovljevic V, Leonardy S, Hoppert M, Sogaard-Andersen L (2008) PilB and PilT are ATPases acting antagonistically in type IV pilus function in *Myxococcus xanthus*. *J Bacteriol* 190(7):2411–2421.
- Treuner-Lange A, et al. (2013) PomZ, a ParA-like protein, regulates Z-ring formation and cell division in *Myxococcus xanthus*. *Mol Microbiol* 87(2):235–253.
- Julien B, Kaiser AD, Garza A (2000) Spatial control of cell differentiation in *Myxococcus xanthus*. *Proc Natl Acad Sci USA* 97(16):9098–9103.
- Jain S, et al. (2012) Characterization of the single stranded DNA binding protein SsbB encoded in the Gonococcal Genetic Island. *PLoS ONE* 7(4):e35285.
- Bulyha I, et al. (2009) Regulation of the type IV pili molecular machine by dynamic localization of two motor proteins. *Mol Microbiol* 74(3):691–706.
- Friedrich C, Bulyha I, Sogaard-Andersen L (2014) Outside-In Assembly Pathway of the Type IV Pilus System in *Myxococcus xanthus*. *J Bacteriol* 196(2):378–390.

**Table S3. Primers used in this work**

| Name        | Nucleotide sequence (5'–3') <sup>a</sup>                                          |
|-------------|-----------------------------------------------------------------------------------|
| 552         | ATGCCGCTGAAGGTCTCTTTGTCGCAACCGC                                                   |
| 553         | TTCAGACGGCATCGCCTGACTCGAGGTTTTGTT                                                 |
| 572         | ATGGTGGTGATGATGGTGATGGCTACCACTTCC<br>TGAACCACCACTGCCCGGTGCGGCAGCCTGTTGTTTTGCCGGTG |
| 573         | ATCACCATCATACCACCATCACGGCTCCGGCTCAAGTGGTGCGACG<br>GGATTTACCGAGTCCGTAGTATCCG       |
| 592         | gagtggtagcTACAGCCCGTGGCAATGGTG                                                    |
| 593         | catcggATCcAAGGATGGGTGCGGGTGATG                                                    |
| 1052        | cggcgatacatatgcaccatcaccatcatcaccatcaccacGCAAATCTGGAGGTGCGCCC                     |
| 1058        | gcgcgccaagcttTATTGGAAAGGGTCGGAATCG                                                |
| 1057        | gcgcccaTATGCAACGTCGTATTATAACCCTGCTCTGCGCGGCAGGTATGGCATTCTC                        |
| 1061        | gcgcgctcgaGTTATTGGAAAGGGTCGGAATC                                                  |
| Omxan3001-A | atcggaaagcttACGAGCAGATGGAGATGT                                                    |
| Omxan3001-B | cgcgccgcCATCAGCGAGGTGAGAAT                                                        |
| Omxan3001-C | tcgctgatgGCGGGCGCTCGCCCTCG                                                        |
| Omxan3001-D | atcgggaattcAGGAAGCCCTGATCCGGA                                                     |
| Omxan3001-1 | atcgggtctagaATGCGCTCCCGGATTCTC                                                    |
| Omxan3001-2 | atcggaaagcttTCAGCGGCTGGCCGAGGG                                                    |
| Omxan3001-3 | atcgggaattcGCGGCTTGAACGAGGGG                                                      |
| Omxan3001-4 | atcggggatccGCGGCTGGCCGAGGGCGA                                                     |
| Omxan3001-7 | atcggggatccGATGTCGCTGATGTTGAGCCTC                                                 |
| Omxan3001-8 | atcggaaagcttTCAGCGGCTGGCCGAGGG                                                    |

<sup>a</sup>Nucleotides that align with the targeted sequence are depicted in capitals.

**Table S4. Strains used in this work**

| Strain                | Relevant characteristics <sup>a</sup>                                                                 | Source        |
|-----------------------|-------------------------------------------------------------------------------------------------------|---------------|
| <i>E. coli</i>        |                                                                                                       |               |
| DH5 $\alpha$          | Cloning strain                                                                                        | Life Sciences |
| Top10                 | Cloning strain                                                                                        | Life Sciences |
| BL21 star (DE3)       | Expression strain                                                                                     | Life Sciences |
| Rosetta 2             | Expression strain                                                                                     | Novagen       |
| <i>N. gonorrhoeae</i> |                                                                                                       |               |
| MS11A                 | WT strain                                                                                             | 1             |
| SJ001                 | MS11 strain with <i>pilQ</i> truncation                                                               | 2             |
| SJ004-MS              | <i>pilQ</i> with insertion encoding internal His-tag                                                  | This work     |
| SJ082-MS              | $\Delta$ <i>tsaP</i>                                                                                  | This work     |
| KS035                 | $\Delta$ <i>tsaP/Plac-tsaP</i>                                                                        | This work     |
| SJ030-MS              | MS11 strain transformed with pSJ030;<br>nonpolar insertion in <i>pilC</i> , ErmC                      | 2             |
| SJ031-MS              | MS11 strain transformed with PCR product<br>to introduce in frame deletion of aa 1–181 of <i>pilP</i> | 2             |
| EP060                 | MS11 strain transformed with pEP057;<br>nonpolar insertion in <i>pilF</i> , ErmC                      | 2             |
| SJ032-MS              | MS11 strain transformed with pSJ032;<br>nonpolar insertion of <i>pilW</i> , ErmC                      | 2             |
| <i>M. xanthus</i>     |                                                                                                       |               |
| DK1622                | WT                                                                                                    | 3             |
| DK8615                | $\Delta$ <i>pilQ</i>                                                                                  | 4             |
| DK10409               | $\Delta$ <i>pilT</i>                                                                                  | 5             |
| DK10410               | $\Delta$ <i>pilA</i>                                                                                  | 5             |
| DK10416               | $\Delta$ <i>pilB</i>                                                                                  | 5             |
| DK10417               | $\Delta$ <i>pilC</i>                                                                                  | 5             |
| SA3001                | $\Delta$ <i>pilO</i>                                                                                  | 6             |
| SA3002                | $\Delta$ <i>pilM</i>                                                                                  | 7             |
| SA3005                | $\Delta$ <i>pilP</i>                                                                                  | 6             |
| SA3044                | $\Delta$ <i>pilN</i>                                                                                  | 6             |
| SA3045                | $\Delta$ <i>pilT/yfp-pilT</i> (pIB75)                                                                 | 7             |
| SA4070                | $\Delta$ <i>pilP/pilA-pilP-sfGFP</i> (pSC102)                                                         | 6             |
| SA4088                | $\Delta$ <i>pilO/pilA-pilO-sfGFP</i> (pSC106)                                                         | 6             |
| SA6011                | $\Delta$ <i>tsaP</i>                                                                                  | This work     |
| SA6012                | WT/ <i>pilA-tsaP-mCherry</i> (pIMB3)                                                                  | This work     |
| SA6013                | $\Delta$ <i>tsaP/pilA-tsaP-mCherry</i> (pIMB3)                                                        | This work     |
| SA6014                | $\Delta$ <i>tsaP/pilA-tsaP</i> (pIMB2)                                                                | This work     |
| SA6015                | $\Delta$ <i>pilQ/pilA-tsaP-mCherry</i> (pIMB3)                                                        | This work     |
| SA6022                | $\Delta$ <i>pilP/pilA-tsaP-mCherry</i> (pIMB3)                                                        | This work     |
| SA6026                | WT/ <i>pilA-tgl, pilQ-sfGFP</i> (pSC120)                                                              | 6             |
| SA6032                | $\Delta$ <i>tsaP/pilA-tgl, pilQ-sfGFP</i> (pSC120)                                                    | This work     |
| SA6041                | $\Delta$ <i>tsaP/pilA-pilP-sfGFP</i> (pSC102)                                                         | This work     |
| SA6043                | $\Delta$ <i>pilA/pilA-tsaP-mCherry</i> (pIMB3)                                                        | This work     |
| SA6044                | $\Delta$ <i>pilB/pilA-tsaP-mCherry</i> (pIMB3)                                                        | This work     |
| SA6045                | $\Delta$ <i>pilC/pilA-tsaP-mCherry</i> (pIMB3)                                                        | This work     |
| SA6046                | $\Delta$ <i>pilM/pilA-tsaP-mCherry</i> (pIMB3)                                                        | This work     |
| SA6047                | $\Delta$ <i>pilO/pilA-tsaP-mCherry</i> (pIMB3)                                                        | This work     |
| SA6048                | $\Delta$ <i>pilT/pilA-tsaP-mCherry</i> (pIMB3)                                                        | This work     |
| SA6049                | $\Delta$ <i>pilN/pilA-tsaP-mCherry</i> (pIMB3)                                                        | This work     |
| SA6050                | $\Delta$ <i>tsaP/pilA-yfp-pilT</i> (pIB75)                                                            | This work     |
| SA6051                | $\Delta$ <i>tsaP/pilA-pilO-sfGFP</i> (pSC106)                                                         | This work     |
| SA6053                | $\Delta$ <i>tgl</i>                                                                                   | 6             |
| SA6059                | $\Delta$ <i>tgl/pilA-tsaP-mCherry</i> (pIMB3)                                                         | This work     |

<sup>a</sup>In constructs with the *P<sub>pilA</sub>* genes were transcribed from the *pilA* promoter. All plasmids were integrated at the Mx8 *attB* site.

- Swanson J (1972) Studies on gonococcus infection. II. Freeze-fracture, freeze-etch studies on gonococci. *J Exp Med* 136(5):1258–1271.
- Jain S, et al. (2011) Structural characterization of outer membrane components of the type IV pili system in pathogenic *Neisseria*. *PLoS ONE* 6(1):e16624.
- Kaiser D (1979) Social gliding is correlated with the presence of pili in *Myxococcus xanthus*. *Proc Natl Acad Sci USA* 76(11):5952–5956.
- Wall D, Kolenbrander PE, Kaiser D (1999) The *Myxococcus xanthus* pilQ (sglA) gene encodes a secretin homolog required for type IV pilus biogenesis, social motility, and development. *J Bacteriol* 181(1):24–33.
- Wu SS, Kaiser D (1996) Markerless deletions of pil genes in *Myxococcus xanthus* generated by counterselection with the *Bacillus subtilis* *sacB* gene. *J Bacteriol* 178(19):5817–5821.
- Friedrich C, Bulyha I, Sogaard-Andersen L (2014) Outside-In Assembly Pathway of the Type IV Pilus System in *Myxococcus xanthus*. *J Bacteriol* 196(2):378–390.
- Bulyha I, et al. (2009) Regulation of the type IV pili molecular machine by dynamic localization of two motor proteins. *Mol Microbiol* 74(3):691–706.
